# Supplementary material for: Potential of 18F-FDG PET toward personalized radiotherapy or chemoradiotherapy in lung cancer
Source: PubMed Central journal article supplement — Eur J Nucl Med Mol Imaging. 2013 Feb 12;40(6):832–41. doi: 10.1007/s00259-013-2348-4 (PMC3644202; doi:10.1007/s00259-013-2348-4), 2013-02-12
Supplement: 259_2013_2348_MOESM1_ESM.pdf [file 259_2013_2348_MOESM1_ESM.pdf]

Online Resource 1

Individual tumor's residual MRglc at S2 (10-12 days post-therapy), residual SUVmax, and their corresponding local tumor control status at 12 months, and model prediction on 62 tumors

| Tumor Number | Residual MRglc <sup>a</sup> (μmol/min/gm) at S2 <sup>b</sup> | Residual SUVmax <sup>c</sup> at S2 | Tumor Control Status <sup>d, e</sup> | Model Prediction <sup>f</sup> |
|--------------|--------------------------------------------------------------|------------------------------------|--------------------------------------|-------------------------------|
| 1            | 0.013                                                        | 0.39                               | 1                                    | 0.99                          |
| 2            | 0.019                                                        | 0.82                               | 1                                    | 0.99                          |
| 3            | 0.019                                                        | 0.67                               | 1                                    | 0.99                          |
| 4            | 0.021                                                        | 1.03                               | 1                                    | 0.98                          |
| 5            | 0.023                                                        | 0.40                               | 1                                    | 0.98                          |
| 6            | 0.032                                                        | 0.55                               | 1                                    | 0.96                          |
| 7            | 0.033                                                        | 0.62                               | 1                                    | 0.96                          |
| 8            | 0.034                                                        | 0.63                               | 1                                    | 0.95                          |
| 9            | 0.036                                                        | 0.74                               | 1                                    | 0.95                          |
| 10           | 0.036                                                        | 0.73                               | 1                                    | 0.95                          |
| 11           | 0.037                                                        | 0.66                               | 1                                    | 0.94                          |
| 12           | 0.037                                                        | 1.15                               | 1                                    | 0.94                          |
| 13           | 0.042                                                        | 0.54                               | 1                                    | 0.93                          |
| 14           | 0.042                                                        | 0.76                               | 1                                    | 0.93                          |
| 15           | 0.044                                                        | 1.21                               | 1                                    | 0.92                          |
| 16           | 0.046                                                        | 1.15                               | 1                                    | 0.91                          |
| 17           | 0.048                                                        | 1.52                               | 1                                    | 0.91                          |
| 18           | 0.048                                                        | 0.78                               | 1                                    | 0.91                          |
| 19           | 0.048                                                        | 0.98                               | 1                                    | 0.91                          |
| 20           | 0.050                                                        | 1.10                               | 1                                    | 0.90                          |
| 21           | 0.050                                                        | 1.31                               | 1                                    | 0.90                          |
| 22           | 0.054                                                        | 1.37                               | 1                                    | 0.88                          |
| 23           | 0.061                                                        | 1.16                               | 1                                    | 0.85                          |
| 24           | 0.063                                                        | 1.11                               | 1                                    | 0.84                          |
| 25           | 0.066                                                        | 1.48                               | 1                                    | 0.83                          |
| 26           | 0.069                                                        | 0.99                               | 1                                    | 0.81                          |

| Tumor Number | Residual MRglc <sup>a</sup><br>( $\mu\text{mol}/\text{min}/\text{gm}$ ) at<br>S2 <sup>b</sup> | Residual<br>SUVmax <sup>c</sup> at S2 | Tumor Control<br>Status <sup>d, e</sup> | Model<br>Prediction <sup>f</sup> |
|--------------|-----------------------------------------------------------------------------------------------|---------------------------------------|-----------------------------------------|----------------------------------|
| 27           | 0.069                                                                                         | 0.98                                  | 1                                       | 0.81                             |
| 28           | 0.072                                                                                         | 1.38                                  | 1                                       | 0.80                             |
| 29           | 0.072                                                                                         | 2.11                                  | 0                                       | 0.80                             |
| 30           | 0.073                                                                                         | 1.63                                  | 0                                       | 0.80                             |
| 33           | 0.073                                                                                         | 1.41                                  | 1                                       | 0.80                             |
| 31           | 0.076                                                                                         | 1.36                                  | 0                                       | 0.78                             |
| 32           | 0.078                                                                                         | 1.40                                  | 0                                       | 0.77                             |
| 34           | 0.081                                                                                         | 1.67                                  | 1                                       | 0.76                             |
| 35           | 0.084                                                                                         | 1.35                                  | 1                                       | 0.74                             |
| 36           | 0.085                                                                                         | 2.09                                  | 1                                       | 0.74                             |
| 37           | 0.086                                                                                         | 1.49                                  | 0                                       | 0.73                             |
| 38           | 0.093                                                                                         | 2.22                                  | 1                                       | 0.70                             |
| 39           | 0.099                                                                                         | 2.74                                  | 0                                       | 0.67                             |
| 40           | 0.103                                                                                         | 1.45                                  | 1                                       | 0.65                             |
| 41           | 0.105                                                                                         | 2.01                                  | 1                                       | 0.64                             |
| 42           | 0.107                                                                                         | 2.10                                  | 0                                       | 0.63                             |
| 43           | 0.116                                                                                         | 2.54                                  | 0                                       | 0.59                             |
| 44           | 0.122                                                                                         | 3.20                                  | 0                                       | 0.56                             |
| 45           | 0.123                                                                                         | 2.24                                  | 0                                       | 0.56                             |
| 46           | 0.124                                                                                         | 3.29                                  | 1                                       | 0.55                             |
| 47           | 0.127                                                                                         | 2.56                                  | 1                                       | 0.54                             |
| 48           | 0.130                                                                                         | 3.24                                  | 1                                       | 0.53                             |
| 49           | 0.133                                                                                         | 2.30                                  | 0                                       | 0.51                             |
| 50           | 0.134                                                                                         | 1.93                                  | 1                                       | 0.51                             |
| 51           | 0.145                                                                                         | 2.21                                  | 1                                       | 0.47                             |
| 52           | 0.160                                                                                         | 3.28                                  | 1                                       | 0.41                             |
| 53           | 0.182                                                                                         | 2.84                                  | 0                                       | 0.35                             |
| 54           | 0.196                                                                                         | 3.38                                  | 0                                       | 0.31                             |
| 55           | 0.197                                                                                         | 3.28                                  | 1                                       | 0.31                             |
| 56           | 0.228                                                                                         | 4.20                                  | 0                                       | 0.25                             |

| Tumor Number | Residual MRglc <sup>a</sup> (μmol/min/gm) at S2 <sup>b</sup> | Residual SUVmax <sup>c</sup> at S2 | Tumor Control Status <sup>d, e</sup> | Model Prediction <sup>f</sup> |
|--------------|--------------------------------------------------------------|------------------------------------|--------------------------------------|-------------------------------|
| 57           | 0.243                                                        | 4.58                               | 0                                    | 0.22                          |
| 58           | 0.282                                                        | 4.55                               | 0                                    | 0.17                          |
| 59           | 0.315                                                        | 6.09                               | 0                                    | 0.14                          |
| 60           | 0.373                                                        | 6.46                               | 1                                    | 0.10                          |
| 61           | 0.460                                                        | 7.67                               | 0                                    | 0.07                          |
| 62           | 0.477                                                        | 7.04                               | 0                                    | 0.06                          |

Abbreviations:

a: MRglc = glucose metabolic rate measured with Simplified kinetic method (SKM); b: S2 = 10-12 days after radiotherapy or chemoradiotherapy; c: SUVmax = maximum standard uptake value and it is given as reference; d: 1 = tumor controlled at 12 months; e: 0 = tumor recurred within 12 months; f: Model prediction is based on residual MRglc measured with SKM.
